# Supplementary material
Source: PubMed Central journal article supplement (PMC10548300)
Supplement: jama-e2317465-s001.pdf [file jama-e2317465-s001.pdf]

## Supplemental Online Content

Sánchez-de-la-Torre M, Gracia-Lavedan E, Benitez ID, et al. Adherence to CPAP treatment and the risk of recurrent cardiovascular events. *JAMA*. doi:10.1001/jama.2023.17465

**eMethods.** Methodological Details Regarding Marginal Structural Models

**eTable 1.** Excluded Articles and Reason

**eTable 2.** Additional Trial Characteristics

**eTable 3.** One-Stage IPD Meta-Analysis for the Individual Components of the Primary Endpoint

**eTable 4.** Baseline Characteristics According to CPAP Compliance Groups in Sensitivity Analysis Population

**eFigure 1.** Direct Acyclic Graph of the Inverse Probability of Treatment Weighted Model to Assess the Effect of CPAP Adherence on the Risk of Recurrent Cardiovascular Event

**eFigure 2.** Risk of Bias Assessment: Assessments Regarding Each Risk of Bias Item for Each Randomized Clinical Trial Included

**eAppendix.** Methodological Details Regarding Literature Search Strategy

**eReferences**

This supplemental material has been provided by the authors to give readers additional information about their work.

## **eMethods. Methodological details regarding marginal structural models**

The prescription of continuous positive airway pressure (CPAP) in asymptomatic patients with obstructive sleep apnea (OSA) and established cardiovascular diseases has not demonstrated a reduction in cardiovascular risk across various clinical trials. This result is unsurprising, given the observed low adherence among this particular patient population. However, despite these findings, it is still crucial to evaluate whether maintaining good compliance with CPAP can effectively mitigate cardiovascular risk in this group. Conducting such an analysis, though, presents significant challenges. The fluctuating nature of adherence among patients prevents them from being categorized strictly into distinct compliance groups. Moreover, extended follow-up periods can introduce changes in individuals that may confound the relationship between adherence and cardiovascular risk. To address these complexities and control for potential confounding factors, marginal structural models<sup>1</sup> offer valuable tools. We adjust MSM to make estimates that could compare cardiovascular risk in a hypothetical scenario in which if all patients presented full CPAP adherence versus they were non-compliers to CPAP. The specifications of the MSM employed in our study are described as follows. Initially, a directed acyclic graph was employed to illustrate the conceptual model representing the causal mechanism of time-varying CPAP adherence and time-varying confounding factors (eFigure 1). To estimate the marginal structural models, stabilized inverse probability weights were utilized, considering the binary exposure of good adherence versus poor adherence to CPAP, which varied over time. The weights were calculated based on the time-invariant and time-varying confounding factors specified in the directed acyclic graph. Sex, age, apnea-hypopnea index, antihypertensive drugs and trial were considered as baseline factors and Epworth sleepiness scale and BMI as time-varying confounder. Changes in BMI would be informative of potential changes in apnea-hypopnea index (AHI)<sup>2</sup> that could affect adherence to the treatment. Moreover, previous studies suggest that BMI changes could affect adherence to therapies<sup>3</sup>. Finally, a potential relationship between CPAP use and BMI changes has been reported<sup>4</sup>. While the direct association between OSA severity and BMI is well-established, the influence that BMI at longer previous periods (e.g., k-2, k-3, etc.) may have on OSA severity at the time of evaluation remains less understood. Consequently, we contend that the impact of BMI at a specific moment will primarily manifest in the immediately following adherence period.

On one hand, stabilized weights included a denominator incorporate probability of selection for good adherences using both time-invariant and time-varying factors. On the other hand, numerator incorporates probability for selection for good adherence using only time-invariant factors. Furthermore, censoring weighting was implemented to address the potential impact of exposure on dropout. The exposure selection weights, and censoring weights were combined to account for both aspects in our analysis. Truncation percentile (0.01; 0.99)

was applied on weights. Subsequently, a marginal structural Cox model was estimated, employing robust standard error estimation to appropriately handle correlated observations. Additionally, a sensitivity analysis was performed, involving the censoring information at the first change of adherence period. This involved identifying and considering the first transition from good adherence to non-adherence and vice versa. With this information, MSM was fitted with the same methodology previously described.

**eTable 1. Excluded articles and reason**

| <b>Author</b>                 | <b>Year</b> | <b>Reason for exclusion</b>           |
|-------------------------------|-------------|---------------------------------------|
| Robinson <sup>5</sup>         | 2006        | Another outcome (hypertension)        |
| Lozano <sup>6</sup>           | 2010        | Another outcome (hypertension)        |
| Barbe <sup>7</sup>            | 2010        | Another outcome (hypertension)        |
| Duran-Cantolla <sup>8</sup>   | 2010        | Another outcome (hypertension)        |
| Drager <sup>9</sup>           | 2011        | Another outcome (hypertension)        |
| Martinez-Garcia <sup>10</sup> | 2013        | Another outcome (hypertension)        |
| Kushida <sup>11</sup>         | 2012        | Another outcome (Non-Cardiovascular)  |
| Bradley <sup>12</sup>         | 2005        | Central apnea population              |
| Cowei <sup>13</sup>           | 2015        | Central apnea population              |
| Glantz <sup>14</sup>          | 2017        | Another outcome (Non-Cardiovascular)  |
| Pedrosa <sup>15</sup>         | 2013        | Another outcome (hypertension)        |
| Lloberes <sup>16</sup>        | 2014        | Another outcome (hypertension)        |
| Chirinos <sup>17</sup>        | 2014        | Another outcome (hypertension)        |
| Gotlieb <sup>18</sup>         | 2014        | Another outcome (Non-Cardiovascular)  |
| Caples <sup>18</sup>          | 2019        | Another outcome (Non-Cardiovascular)  |
| Craig <sup>19</sup>           | 2009        | Another outcome (Non-Cardiovascular)  |
| Barbé <sup>20</sup>           | 2012        | Wrong population (non cardiovascular) |
| Craig <sup>21</sup>           | 2012        | Wrong population (including mild OSA) |
| McMillan <sup>22</sup>        | 2014        | Wrong population (including mild OSA) |
| Huang <sup>23</sup>           | 2015        | Another outcome (hypertension)        |
| Parra <sup>24</sup>           | 2015        | Short follow up                       |

**eTable 2. Additional trial characteristics**

|                           | <b>SAVE Study</b>                                                                                                                                                                                                                                                                                                                                                                                                                                                                                                                                                                                                                                                                                                          | <b>ISAACC Study</b>                                                                                                                                                                                                                                                                                                                                                                                                                                                                                                                                                                                                                                                     | <b>RICCADSA Study</b>                                                                                                                                                                                                                                                                                                                                                                                          |
|---------------------------|----------------------------------------------------------------------------------------------------------------------------------------------------------------------------------------------------------------------------------------------------------------------------------------------------------------------------------------------------------------------------------------------------------------------------------------------------------------------------------------------------------------------------------------------------------------------------------------------------------------------------------------------------------------------------------------------------------------------------|-------------------------------------------------------------------------------------------------------------------------------------------------------------------------------------------------------------------------------------------------------------------------------------------------------------------------------------------------------------------------------------------------------------------------------------------------------------------------------------------------------------------------------------------------------------------------------------------------------------------------------------------------------------------------|----------------------------------------------------------------------------------------------------------------------------------------------------------------------------------------------------------------------------------------------------------------------------------------------------------------------------------------------------------------------------------------------------------------|
| <b>Inclusion criteria</b> | <ol style="list-style-type: none"> <li>1. Males and females, any race, and aged between 45 and 75 years.</li> <li>2. Established coronary or cerebrovascular disease.</li> <li>3. Moderate-severe OSA (equivalent to apnea-hypopnea index &gt;30/h) as determined by a <math>\geq</math>4% oxygen dip rate &gt;12/h on overnight testing.</li> <li>5. Written informed consent signed.</li> </ol>                                                                                                                                                                                                                                                                                                                          | <ol style="list-style-type: none"> <li>1. Men and women over 18 years old.</li> <li>2. Patients admitted for acute coronary syndrome.</li> <li>3. Patients with and Epworth sleepiness scale score <math>\leq</math>10.</li> <li>4. Written informed consent signed.</li> </ol>                                                                                                                                                                                                                                                                                                                                                                                         | <ol style="list-style-type: none"> <li>1. Patients with CAD who have newly undergone percutaneous coronary intervention or coronary artery bypass graft treatment in the previous 6 months.</li> <li>2. Written informed study consent.</li> <li>3. OSA (apnea-hypopnea index <math>\geq</math>15/h) or non-OSA (apnea-hypopnea index &lt;5/h) diagnosis on the unattended sleep recording at home.</li> </ol> |
| <b>Exclusion criteria</b> | <ol style="list-style-type: none"> <li>1. Any condition that makes the potential participant unsuitable for the study.</li> <li>2. Any coronary or carotid revascularization procedure in the next 6 months.</li> <li>3. Severe respiratory disease.</li> <li>4. NYHA categories III-IV of heart failure.</li> <li>5. Other member enrolled in SAVE trial.</li> <li>6. Prior use of CPAP treatment for OSA.</li> <li>7. Increased risk of a sleep-related accident and/or excessive daytime sleepiness (Epworth sleepiness scale score &gt;15).</li> <li>8. Severe nocturnal desaturation (&gt;10% overnight recording time with arterial oxygen saturation of &lt;80%).</li> <li>9. Cheyne-Stokes respiration.</li> </ol> | <ol style="list-style-type: none"> <li>1. Prior use of CPAP treatment for OSA.</li> <li>2. Inability to complete questionnaires.</li> <li>3. Presence of any sleep disorders.</li> <li>4. Cheyne-Stokes respiration.</li> <li>5. Patients with limiting chronic diseases.</li> <li>6. A medical history that may interfere with the study objectives.</li> <li>7. Any medical factor, social or geographical, that may jeopardize patient compliance.</li> <li>8. Any process, cardiovascular or otherwise, that limits life expectancy to less than one year.</li> <li>9. Patients in cardiogenic shock who have poor expectations for short-term outcomes.</li> </ol> | <ol style="list-style-type: none"> <li>1. Patients with already treated OSA.</li> <li>2. Cheyne-Stokes breathing.</li> <li>3. Patients with borderline OSA (apnea-hypopnea index &lt;15 and <math>\geq</math>5/h) upon the unattended sleep recording at home.</li> </ol>                                                                                                                                      |
| <b>Follow-up visits</b>   | At 1, 3, 6, and 12 months, and annually thereafter.                                                                                                                                                                                                                                                                                                                                                                                                                                                                                                                                                                                                                                                                        | At 1, 3, 6, 12, 18, 24, 30, and 36 months, and annually thereafter.                                                                                                                                                                                                                                                                                                                                                                                                                                                                                                                                                                                                     | At 3, 6, and 12 months, and annually thereafter.                                                                                                                                                                                                                                                                                                                                                               |

**eTable 3. One-stage IPD meta-analysis for the individual components of the primary endpoint**

|                                                | Hazard ratio (95% CI) | p value |
|------------------------------------------------|-----------------------|---------|
| Cardiovascular death                           | 0.95 (0.62-1.47)      | 0.83    |
| Myocardial infarction                          | 1.08 (0.8-1.46)       | 0.61    |
| Stroke                                         | 0.97 (0.71-1.33)      | 0.85    |
| Hospitalization for heart failure*             | 0.91 (0.59-1.4)       | 0.66    |
| Hospitalization for unstable angina*           | 0.96 (0.76-1.22)      | 0.76    |
| Hospitalization for transient ischemic attack* | 1.79 (0.86-3.73)      | 0.12    |

Mixed-effects Cox proportional hazards model adjusted by trial as random effects. CI, confidence interval. \*Data available for SAVE and ISAACC trials.

**eTable 4. Baseline characteristics according to CPAP compliance groups in sensitivity analysis population**

|                                       | Poor adherence<br>(N=961) | Good adherence<br>(N=1057) |
|---------------------------------------|---------------------------|----------------------------|
| Age, years                            | 60.6 (8.95)               | 61.6 (8.08)                |
| Sex                                   |                           |                            |
| Male                                  | 777 (80.9%)               | 878 (83.1%)                |
| Female                                | 184 (19.1%)               | 179 (16.9%)                |
| BMI, kg/m <sup>2</sup>                | 28.4 [25.9;31.0]          | 28.3 [25.9;31.4]           |
| Lifestyle factors                     |                           |                            |
| Smoking status                        |                           |                            |
| Never                                 | 329 (34.2%)               | 426 (40.3%)                |
| Former                                | 337 (35.1%)               | 411 (38.9%)                |
| Current                               | 295 (30.7%)               | 220 (20.8%)                |
| Current alcohol consumption           | 238 (27.1%)               | 259 (25.5%)                |
| Obstructive sleep apnea measures      |                           |                            |
| Apnea-hypopnea index                  | 26.0 [18.0;39.0]          | 27.0 [17.2;42.0]           |
| Oxygen desaturation index             | 22.9 [15.0;34.4]          | 25.0 [17.0;38.0]           |
| Mean SaO <sub>2</sub>                 | 92.6 (6.62)               | 93.1 (3.36)                |
| Minimum SaO <sub>2</sub>              | 79.7 (6.82)               | 78.0 (6.71)                |
| % of time with SaO <sub>2</sub> <90%  | 6.52 [1.60;16.7]          | 8.23 [3.10;22.3]           |
| Epworth sleepiness scale score        | 6.00 [4.00;8.00]          | 7.00 [4.00;9.00]           |
| Medical history                       |                           |                            |
| Hypertension                          | 659 (68.6%)               | 777 (73.5%)                |
| Any transient ischemic attack         | 247 (25.7%)               | 357 (33.8%)                |
| Diabetes mellitus                     | 281 (29.2%)               | 308 (29.1%)                |
| Medication                            |                           |                            |
| Antihypertensive drugs                | 645 (67.1%)               | 796 (75.3%)                |
| Antiplatelet and antithrombotic drugs | 544 (56.6%)               | 723 (68.4%)                |
| Lipid-lowering drug                   | 483 (50.3%)               | 608 (57.5%)                |

|                               |             |             |
|-------------------------------|-------------|-------------|
| Antidiabetics oral medication | 197 (20.5%) | 230 (21.8%) |
| Insulin                       | 54 (5.62%)  | 70 (6.62%)  |

Data are n (%), mean (standard deviation) or median [q1; q3]. q1: first quartile; q3: third quartile; CPAP: continuous positive airway pressure; BMI: body mass index;

**eFigure 1. Direct acyclic graph of the inverse probability of treatment weighted model to assess the effect of CPAP adherence on the risk of recurrent cardiovascular event**

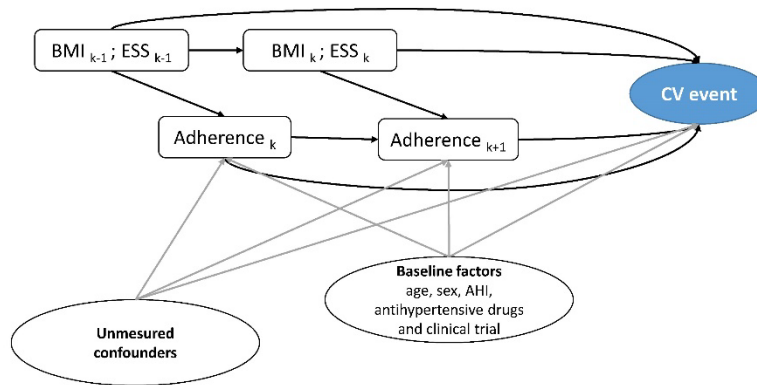

Directed acyclic graph (DAG) is used to show longitudinal confounding variables. We assumed that BMI is a potential time-varying confounding factor due to their directly relationship with cardiovascular risk and inversely related with future compliance (due to apnea-hypopnea index reduction). BMI, Epworth sleepiness scale score (ESS) and CPAP adherence are time-varying, and BMI<sub>k</sub>, Epworth sleepiness scale score (ESS<sub>k</sub>) and CPAP adherence<sub>k</sub> indicates measurements at visit k. The inverse probability of treatment weighting model is additionally adjusted for age, sex, apnea-hypopnea index, Epworth, antihypertensive drugs and trial as baseline factors. Abbreviations: ESS: Epworth sleepiness scale score)

**eFigure 2. Risk of bias assessment: assessments regarding each risk of bias item for each randomized clinical trial included**

Green (+) = low risk of bias, yellow (?) = unclear risk of bias, red (-) = high risk of bias.

|                          | Random sequence generation (selection bias) | Allocation concealment (selection bias) | Blinding of participants and personnel (performance bias) | Blinding of outcome assessment (detection bias) | Incomplete outcome data (attrition bias) | Selective reporting (reporting bias) | Other bias |
|--------------------------|---------------------------------------------|-----------------------------------------|-----------------------------------------------------------|-------------------------------------------------|------------------------------------------|--------------------------------------|------------|
| McEvoy 2016              | +                                           | ?                                       | -                                                         | +                                               | +                                        | +                                    | +          |
| Peker 2016               | +                                           | +                                       | -                                                         | +                                               | +                                        | +                                    | +          |
| Sanchez-de-la-Torre 2019 | +                                           | +                                       | -                                                         | +                                               | +                                        | +                                    | +          |

**eFigure 3. One-stage IPD meta-analysis of the CPAP effect for MACCEs according to the subgroup patients**

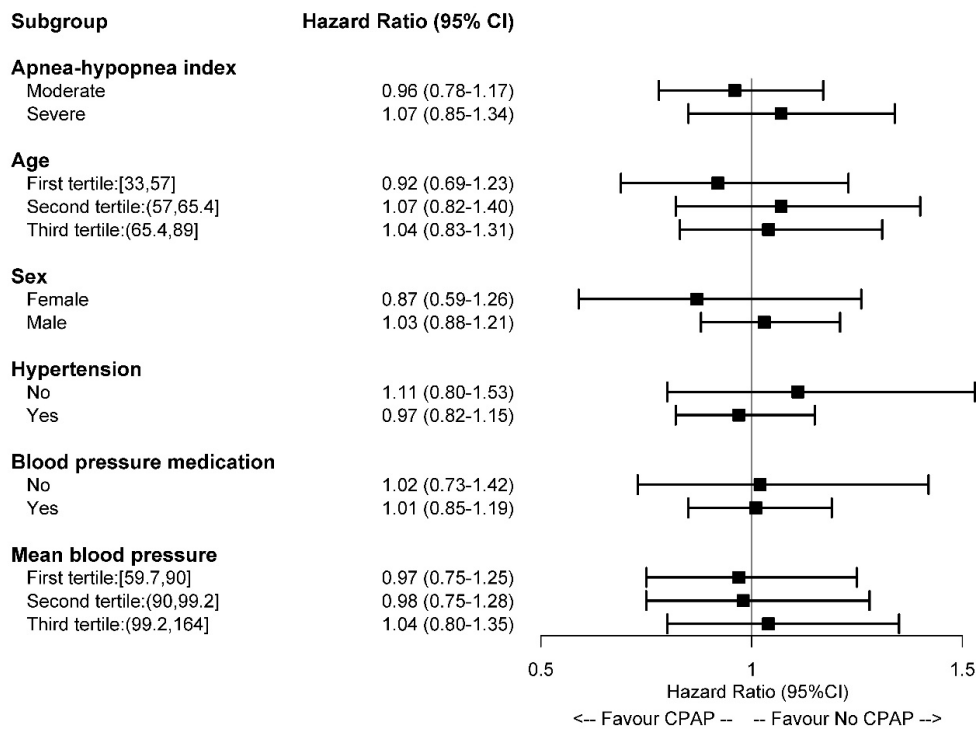

Mixed-effects Cox proportional hazards model adjusted by trial as random effects. CI: confidence interval.



## eAppendix. Methodological details regarding literature search strategy

### 1. PubMed (MEDLINE)

Last search: 23 June 2023

The following strategy will be used to search MEDLINE (PubMed):

1. "Sleep Apnea, Obstructive"[Mesh]
2. "Sleep Apnea Syndromes"[Mesh]
3. (Obstruct\* OR sleep) AND (apnea\* OR apnoea\*)
4. Obstruct\* AND (hypopnea\* OR hypopnoea\* OR hypoapnea\* OR hypoapnoea\*)
5. Upper airway resistant\* AND sleep apnea\*
6. Sleep AND (disorder\* AND breathing)
7. OSA
8. OSAS
9. OSAHS
10. #1 OR #2 OR #3 OR #4 OR #5 OR #6 OR #7 OR #8 OR #9
11. "Respiration, Artificial"[Mesh]
12. "Ventilators, Mechanical"[Mesh]
13. NIPPV OR NPPV OR NIV OR NIAV OR CPAP OR (positive AND pressure)
14. #11 OR #12 OR #13
15. "Mortality"[Mesh]
16. "Acute Coronary Syndrome"[Mesh]
17. "Stroke"[Mesh]
16. "Cardiovascular system"[Mesh]
17. "Heart Failure"[Mesh] or "Heart failure, systolic"[Mesh] or "Heart failure, diastolic"[Mesh]
18. "Sleep" or "Sleep Stages" [Mesh]
19. #15 OR #16 OR #17 OR #18 OR
20. Randomized controlled trial [Publication Type]
21. #10 AND #14 AND #20
22. #21 OR #15 OR #16 OR #17 OR #18OR#19 OR #20

The MEDLINE strategy was adapted to the syntax and subject headings of the other databases.

### 2. EMBASE

Host: Embase.com

Date of Search: 23 June 2023

#1. (obstructive sleep apnea) (continuous positive airway pressure) (placebo)(cardiovascular)"

#2. obstructive sleep apnea

#3. sleep apnea

Filter: Classification/Clinical trial

### 3. COCHRANE DATABASE OF SYSTEMATIC REVIEWS

Host: Wiley

Date of search: 23 June 2023

#1 ippv or nppv or niv or niav or cpap or (positive and pressure)

#2 MeSH descriptor: explode all trees

#3 MeSH descriptor: [Respiration, Artificial] explode all trees

#4 #1 or #2 or #3

#5 MeSH descriptor: [Sleep Apnea, Obstructive] explode all trees

#6 MeSH descriptor: [Sleep disorder breathing] explode all trees

#7 MeSH descriptor: [Sleep Apnea Syndromes] explode all trees

#8 (obstruct\* or sleep) and (apnea\* or apnoea\*)

#9 obstruct\* and (hypopnea\* or hypopnoea\* or hypoapnea\* or hypoapnoea\*)

#10 Mesh descriptor: [cardiovascular]: explode all trees

#11 Mesh descriptor: [myocardial infarction]: explode all trees

#12 osahs

#13 osa

#14 osas

#15 Sleep apnea

#16 Sleep disorder breathing  
#17 #5 or #6 or #7 or #8 or #9 or #12 or #13 or #14  
#18 #10 or #11 or #15 or #16 #19 #4 and #15 #20 #17 or 18

## References

1. MA H, JM R. *Causal Inference: What If*. (Hall/CRC BRC&, ed.); 2020.
2. Peppard PE, Young T, Palta M, Dempsey J, Skatrud J. Longitudinal Study of Moderate Weight Change and Sleep-Disordered Breathing. *JAMA*. 2000;284(23):3015-3021. doi:10.1001/jama.284.23.3015
3. Boye KS, Shinde S, Kennedy-Martin T, Robinson S, Thieu VT. Weight Change and the Association with Adherence and Persistence to Diabetes Therapy: A Narrative Review. *Patient preference adherence*. 2022;16:23-39. doi:10.2147/ppa.s328583
4. Drager LF, Brunoni AR, Jenner R, Lorenzi-Filho G, Benseñor IM, Lotufo PA. Effects of CPAP on body weight in patients with obstructive sleep apnoea: a meta-analysis of randomised trials. *Thorax*. 2015;70(3):258. doi:10.1136/thoraxjnl-2014-205361
5. Robinson G, Smith D, Langford B, Davies R, Stradling J. Continuous positive airway pressure does not reduce blood pressure in nonsleepy hypertensive OSA patients. *The European respiratory journal : official journal of the European Society for Clinical Respiratory Physiology*. 2006;27(6):1229-1235. [http://www.ncbi.nlm.nih.gov/entrez/query.fcgi?cmd=Retrieve&db=PubMed&dopt=Citation&list\\_uids=16455835](http://www.ncbi.nlm.nih.gov/entrez/query.fcgi?cmd=Retrieve&db=PubMed&dopt=Citation&list_uids=16455835)
6. Lozano L, Tovar JL, Sampol G, et al. Continuous positive airway pressure treatment in sleep apnea patients with resistant hypertension: a randomized, controlled trial. *Journal of Hypertension*. Published online June 2010:1. doi:10.1097/hjh.0b013e32833b9c63
7. Barbé F, Durán-Cantolla J, Capote F, et al. Long-term effect of continuous positive airway pressure in hypertensive patients with sleep apnea. *American journal of respiratory and critical care medicine*. 2010;181(7):718-726. doi:10.1164/rccm.200901-0050oc
8. Durán-Cantolla J, Aizpuru F, Montserrat JM, et al. Continuous positive airway pressure as treatment for systemic hypertension in people with obstructive sleep apnoea: randomised controlled trial. *BMJ (Clinical research ed)*. 2010;341:c5991.
9. Drager LF, Pedrosa RP, Diniz PM, et al. The effects of continuous positive airway pressure on prehypertension and masked hypertension in men with severe obstructive sleep apnea. *Hypertension*. 2011;57(3):549-555. doi:10.1161/hypertensionaha.110.165969
10. Martínez-García MA, Capote F, Campos-Rodríguez F, et al. Effect of CPAP on Blood Pressure in Patients With Obstructive Sleep Apnea and Resistant Hypertension: The HIPARCO Randomized Clinical Trial. *JAMA*. 2013;310(22):2407-2415. doi:10.1001/jama.2013.281250
11. Kushida CA, Nichols DA, Holmes TH, et al. Effects of Continuous Positive Airway Pressure on Neurocognitive Function in Obstructive Sleep Apnea Patients: The Apnea Positive Pressure Long-term Efficacy Study (APPLES). *Sleep*. 2012;35(12):1593-1602. doi:10.5665/sleep.2226
12. Bradley TD, Logan AG, Kimoff RJ, et al. Continuous positive airway pressure for central sleep apnea and heart failure. *N Engl J Med*. 2005;353(19):2025-2033. doi:10.1056/nejmoa051001

13. R. CM, Holger W, Karl W, et al. Adaptive Servo-Ventilation for Central Sleep Apnea in Systolic Heart Failure. *N Engl J Med*. 2015;373(12):1095-1105. doi:10.1056/nejmoa1506459
14. Glantz H, Johansson MC, Thunström E, et al. Effect of CPAP on diastolic function in coronary artery disease patients with nonsleepy obstructive sleep apnea: A randomized controlled trial. *Int J Cardiol*. 2017;241:12-18. doi:10.1016/j.ijcard.2017.03.100
15. Pedrosa RP, Drager LF, Paula LKG de, Amaro ACS, Bortolotto LA, Lorenzi-Filho G. Effects of OSA Treatment on BP in Patients With Resistant Hypertension A Randomized Trial. *Chest*. 2013;144(5):1487-1494. doi:10.1378/chest.13-0085
16. Lloberes P, Sampol G, Espinel E, et al. A randomized controlled study of CPAP effect on plasma aldosterone concentration in patients with resistant hypertension and obstructive sleep apnea. *J Hypertens*. 2014;32(8):1650-1657. doi:10.1097/hjh.0000000000000238
17. A. CJ, Indira G, Karen T, et al. CPAP, Weight Loss, or Both for Obstructive Sleep Apnea. *N Engl J Med*. 2014;370(24):2265-2275. doi:10.1056/nejmoa1306187
18. Caples SM, Mansukhani MP, Friedman PA, Somers VK. The impact of continuous positive airway pressure treatment on the recurrence of atrial fibrillation post cardioversion: A randomized controlled trial. *Int J Cardiol*. 2019;278:133-136. doi:10.1016/j.ijcard.2018.11.100
19. Craig S, Pepperell JCT, Kohler M, Crosthwaite N, Davies RJO, Stradling JR. Continuous positive airway pressure treatment for obstructive sleep apnoea reduces resting heart rate but does not affect dysrhythmias: a randomised controlled trial. *J Sleep Res*. 2009;18(3):329-336. doi:10.1111/j.1365-2869.2008.00726.x
20. Barbé F, Durán-Cantolla J, Sánchez-de-la-Torre M, et al. Effect of Continuous Positive Airway Pressure on the Incidence of Hypertension and Cardiovascular Events in Nonsleepy Patients With Obstructive Sleep Apnea: A Randomized Controlled Trial. *JAMA*. 2012;307(20):2161-2168. doi:10.1001/jama.2012.4366
21. Craig SE, Kohler M, Nicoll D, et al. Continuous positive airway pressure improves sleepiness but not calculated vascular risk in patients with minimally symptomatic obstructive sleep apnoea: the MOSAIC randomised controlled trial. *Thorax*. 2012;67(12):1090. doi:10.1136/thoraxjnl-2012-202178
22. McMillan A, Bratton DJ, Faria R, et al. Continuous positive airway pressure in older people with obstructive sleep apnoea syndrome (PREDICT): a 12-month, multicentre, randomised trial. *Lancet Respir Med*. 2014;2(10):804-812. doi:10.1016/s2213-2600(14)70172-9
23. Huang Z, Liu Z, Luo Q, et al. Long-Term Effects of Continuous Positive Airway Pressure on Blood Pressure and Prognosis in Hypertensive Patients with Coronary Heart Disease and Obstructive Sleep Apnea: A Randomized Controlled Trial. *Am J Hypertens*. 2015;28(3):300-306. doi:10.1093/ajh/hpu147
24. Parra O, Sánchez-Armengol Á, Capote F, et al. Efficacy of continuous positive airway pressure treatment on 5-year survival in patients with ischaemic stroke and obstructive sleep apnea: a randomized controlled trial. *J Sleep Res*. 2014;24(1):47-53. doi:10.1111/jsr.12181
