# Supplementary material
Source: PubMed Central journal article supplement (PMC10548300)
Supplement: jama-e2317465-s002.pdf [file jama-e2317465-s002.pdf]

## Data Sharing Statement

Sánchez-de-la-Torre. Adherence to CPAP Treatment and the Risk of Recurrent Cardiovascular Events. *JAMA*. Published October 03, 2023. doi:10.1001/jama.2023.17465

### Data

**Data available:** Yes

**Data types:** Deidentified participant data, Data dictionary

**How to access data:** All available data can be obtained by contacting the corresponding authors ([febarbe.lleida.ics@gencat.cat](mailto:febarbe.lleida.ics@gencat.cat)).

**When available:** With publication

### Supporting Documents

**Document types:** None

### Additional Information

**Who can access the data:** Researchers whose proposed use of the data has been approved

**Types of analyses:** Specified purpose

**Mechanisms of data availability:** It will be necessary to provide a detailed protocol for the proposed study, to provide the approval of an ethics committee, to supply information about the funding and resources one has to carry out the study, and to consider inviting the original authors to participate in the re-analysis.
